# Supplementary material for: A ventral hippocampal-lateral septum pathway regulates social novelty preference
Source: eLife. 2025 Jun 4;13:RP97259. doi: 10.7554/eLife.97259 (PMC12136592; doi:10.7554/eLife.97259)
Supplement: Figure 1—source data 1. [file elife-97259-fig1-data1.xlsx]

## Sheet: Figure 1D and 1E
Novel vs Familiar Mouse: mCherry Group: Saline
Figure 1D						Figure 1E
Sex	Virus	Condition	% timespent Novel	% timespent Familiar		Discrimination score
F	mCherry	Saline	43.0214	45.6962		-0.0301493
F	mCherry	Saline	37.5135	54.0038		-0.180188
F	mCherry	Saline	82.2265	12.7406		0.731684
F	mCherry	Saline	54.8704	40.205		0.154251
F	mCherry	Saline	70.1358	19.5067		0.564789
F	mCherry	Saline	55.1037	37.3302		0.192283
F	mCherry	Saline	99.1334	0		1
M	mCherry	Saline	19.7317	76.7019		-0.590772
M	mCherry	Saline	51.5497	40.3599		0.121748
M	mCherry	Saline	46.9338	34.6692		0.150296
M	mCherry	Saline	60.7732	28.262		0.365151
M	mCherry	Saline	63.1364	25.5645		0.423579
M	mCherry	Saline	55.3789	32.9142		0.254432
M	mCherry	Saline	46.7961	41.9798		0.0542519
M	mCherry	Saline	55.712	36.1637		0.21277
M	mCherry	Saline	60.2483	30.3449		0.330084
M	mCherry	Saline	58.1702	38.0635		0.208936
M	mCherry	Saline	41.1716	51.2707		-0.109248
M	mCherry	Saline	71.6464	25.3124		0.477872
		Mean	56.487	35.3205		0.227988
		SEM	3.94392	3.75142		0.079581
Novel vs Familiar Mouse: mCherry Group: CNO
Figure 1D						Figure 1E
Sex	Virus	Condition	% timespent Novel	% timespent Familiar		Discrimination score
F	mCherry	CNO	73.0439	20.265		0.565637
F	mCherry	CNO	31.5378	61.0607		-0.318828
F	mCherry	CNO	86.378	8.87594		0.813636
F	mCherry	CNO	67.8443	25.4312		0.454708
F	mCherry	CNO	79.1368	16.7972		0.649818
F	mCherry	CNO	53.7872	43.8463		0.101818
F	mCherry	CNO	58.2201	39.4884		0.191711
M	mCherry	CNO	49.6251	42.8429		0.0733465
M	mCherry	CNO	40.53	50.6874		-0.111355
M	mCherry	CNO	56.7369	32.3473		0.273782
M	mCherry	CNO	61.1565	32.228		0.309779
M	mCherry	CNO	46.3756	42.3929		0.0448658
M	mCherry	CNO	54.0077	37.2438		0.183711
M	mCherry	CNO	41.9048	48.221		-0.0700814
M	mCherry	CNO	59.745	34.9554		0.261769
M	mCherry	CNO	60.6932	32.4669		0.302987
M	mCherry	CNO	73.9938	23.7647		0.513808
M	mCherry	CNO	45.8712	44.2296		0.0182188
M	mCherry	CNO	71.2357	26.5228		0.457382
		Mean	58.517	34.9299		0.248248
		SEM	3.27747	2.9352		0.0651596
Name	Figure	Test						P value	N
Combined vHPC-LS SDT mCherry - Timespent	1D	ANOVA	ANOVA table	SS	DF	MS	F (DFn, DFd)	P value	19
			Saline vs CNO x Novel vs Familiar	27.83	1	27.83	F (1, 36) = 0.2246	P=.638
			Saline vs CNO	12.77	1	12.77	F (1, 36) = 0.1030	P=.750
			Novel vs Familiar	9514	1	9514	F (1, 36) = 27.86	P=6.40E-06
		Sidak PH	NF mCherry Saline					0.00011
		Sidak PH	NF mCherry CNO					1.9e-05
Combined vHPC-LS SDT mCherry - Discrimination Score	1E	One sample t-test					t, df	P value (two tailed)	19
		(two-tailed)	Saline - N vs F				t=2.865, df=18	0.0103
			CNO - N vs F				t=3.810, df=18	0.0013

## Sheet: Figure 1F and 1G
Novel vs Familiar Mouse: hM4Di Group: Saline
Figure 1F						Figure 1G
Sex	Virus	Condition	% timespent Novel	% timespent Familiar		Discrimination score
F	DREADDs	Saline	72.8273	18.6734		0.59184
F	DREADDs	Saline	48.5876	44.4296		0.0447012
F	DREADDs	Saline	72.5856	22.5315		0.526237
F	DREADDs	Saline	60.0367	27.0144		0.379343
F	DREADDs	Saline	43.5964	44.8629		-0.014318
F	DREADDs	Saline	57.4238	36.5106		0.222636
F	DREADDs	Saline	40.4683	56.7989		-0.167894
M	DREADDs	Saline	53.6372	32.1557		0.250389
M	DREADDs	Saline	53.1206	38.9468		0.153951
M	DREADDs	Saline	47.6627	23.5564		0.338481
M	DREADDs	Saline	43.4594	51.7914		-0.0874738
M	DREADDs	Saline	58.2701	29.3976		0.329341
M	DREADDs	Saline	62.6427	34.3497		0.291702
M	DREADDs	Saline	64.6863	28.6726		0.385755
M	DREADDs	Saline	50.3208	43.9213		0.0679045
M	DREADDs	Saline	40.0767	56.3573		-0.168827
F	DREADDs	Saline	47.446	37.2469		0.120425
F	DREADDs	Saline	47.3254	41.1765		0.0694784
F	DREADDs	Saline	55.0992	32.9862		0.25104
F	DREADDs	Saline	52.1123	39.3467		0.139577
		Mean	53.5692	37.0363		0.186215
		SEM	2.12996	2.39342		0.0471132
Novel vs Familiar Mouse: hM4Di Group: CNO
Figure 1F						Figure 1G
Sex	Virus	Condition	% timespent Novel	% timespent Familiar		Discrimination score
F	DREADDs	CNO	68.5552	25.2708		0.461327
F	DREADDs	CNO	64.0799	32.2648		0.330222
F	DREADDs	CNO	54.5538	40.9049		0.142982
F	DREADDs	CNO	65.2641	27.2705		0.410589
F	DREADDs	CNO	33.7832	64.1173		-0.309846
F	DREADDs	CNO	57.8702	29.8142		0.319966
F	DREADDs	CNO	54.0288	29.5475		0.292921
M	DREADDs	CNO	48.0547	43.6724		0.0477748
M	DREADDs	CNO	42.1846	46.6672		-0.0504501
M	DREADDs	CNO	46.8628	42.8631		0.0445765
M	DREADDs	CNO	41.0015	52.5579		-0.123519
M	DREADDs	CNO	47.3461	46.3711		0.0104028
M	DREADDs	CNO	21.7707	51.7095		-0.407441
M	DREADDs	CNO	37.6219	55.7287		-0.193966
M	DREADDs	CNO	36.6254	52.5538		-0.178611
M	DREADDs	CNO	41.1716	50.8041		-0.104729
F	DREADDs	CNO	36.3053	50.2375		-0.160986
F	DREADDs	CNO	43.3511	42.6012		0.00872431
F	DREADDs	CNO	28.7035	66.3556		-0.396091
F	DREADDs	CNO	43.9797	46.7378		-0.0304032
		Mean	45.6557	44.9025		0.0056721
		SEM	2.73917	2.5795		0.0572833
Stats
Name	Figure	Test						P value	N
Combined vHPC-LS SDT DREADD - Timespent	1F	ANOVA	ANOVA table	SS	DF	MS	F (DFn, DFd)	P value	20
			Saline vs CNO x N vs F	1245	1	1245	F (1, 38) = 13.16	P=8.4E-04
			Saline vs CNO	0.01122	1	0.01122	F (1, 38) = 0.0001186	P=.991
			N vs F	1494	1	1494	F (1, 38) = 9.987	P=.003
		Sidak PH	NF DREADD Saline					2e-05
		Sidak PH	NF DREADD CNO					0.971
Combined vHPC-LS SDT DREADD - Discrimination Score	1G	One sample t-test					t, df	P value (two tailed)	20
		(two-tailed)	Saline - N vs F				t=3.952, df=19	0.0009
			CNO - N vs F				t=0.09902, df=19	0.9222

## Sheet: Figure 1H and 1I
Novel vs Familiar Food: mCherry Group: Saline
Figure 1H						Figure 1I
Sex	Virus	Condition	% timespent Novel	% timespent Familiar		Discrimination score
F	mCherry	Saline	28.5619	57.2571		-0.334369
F	mCherry	Saline	31.1406	52.0427		-0.251278
F	mCherry	Saline	27.506	52.379		-0.311359
F	mCherry	Saline	41.657	45.5037		-0.0441345
F	mCherry	Saline	37.9684	47.3689		-0.110157
F	mCherry	Saline	52.8495	38.5519		0.156427
M	mCherry	Saline	49.0376	43.2047		0.063234
M	mCherry	Saline	47.1505	45.2425		0.0206511
M	mCherry	Saline	41.6799	50.1875		-0.0926077
M	mCherry	Saline	22.8545	74.9542		-0.532669
M	mCherry	Saline	52.204	41.8465		0.110127
M	mCherry	Saline	37.7302	58.0868		-0.212453
M	mCherry	Saline	39.8517	54.7325		-0.157329
M	mCherry	Saline	49.9625	44.8555		0.0538617
M	mCherry	Saline	50.9539	44.5472		0.0670854
M	mCherry	Saline	29.3201	67.1388		-0.39207
M	mCherry	Saline	21.2465	77.3788		-0.569148
M	mCherry	Saline	48.346	50.3958		-0.0207595
		Mean	39.4456	52.5374		-0.142053
		SEM	2.47222	2.58851		0.0514957
Novel vs Familiar Food: mCherry Group: CNO
Figure 1H						Figure 1I
Sex	Virus	Condition	% timespent Novel	% timespent Familiar		Discrimination score
F	mCherry	CNO	47.5877	38.1052		0.110657
F	mCherry	CNO	26.5145	62.4615		-0.404008
F	mCherry	CNO	23.8647	68.4026		-0.482706
F	mCherry	CNO	58.5069	26.1456		0.382283
F	mCherry	CNO	22.3546	69.9467		-0.515617
F	mCherry	CNO	34.211	54.4576		-0.228341
M	mCherry	CNO	37.5854	56.6906		-0.202651
M	mCherry	CNO	39.2467	54.2955		-0.160877
M	mCherry	CNO	38.8634	51.479		-0.139642
M	mCherry	CNO	34.4526	61.3148		-0.280494
M	mCherry	CNO	43.6594	46.4923		-0.0314233
M	mCherry	CNO	51.4457	41.7382		0.104176
M	mCherry	CNO	38.6218	55.637		-0.180516
M	mCherry	CNO	33.6833	61.5263		-0.29244
M	mCherry	CNO	56.262	37.3052		0.2026
M	mCherry	CNO	35.4804	63.1531		-0.280561
M	mCherry	CNO	8.36527	89.885		-0.829715
M	mCherry	CNO	12.0657	86.8428		-0.756024
		Mean	35.7095	56.9933		-0.221405
		SEM	3.20663	3.81898		0.0737661
Name	Figure	Test						P value	N
Combined vHPC-LS Food mCherry - Timespent	1H	ANOVA	ANOVA table	SS	DF	MS	F (DFn, DFd)	P value	18
			Saline vs CNO	2.331	1	2.331	F (1, 17) = 0.5605	P=.464
			Novel vs Familiar	5318	1	5318	F (1, 17) = 12.15	P=.003
			Saline vs CNO x Novel vs Familiar	302	1	302	F (1, 17) = 1.392	P=.254
		Sidak PH	NF mCherry Saline					0.0323
		Sidak PH	NF mCherry CNO					0.0009
Combined vHPC-LS Food mCherry - Discrimination Score	1I	One sample t-test					t, df	P value (two tailed)	18
		(two-tailed)	Saline - N vs F				t=2.759, df=17	0.0134
			CNO - N vs F				t-3.001, df=17	0.008

## Sheet: Figure 1J and 1K
Novel vs Familiar Food: hM4Di Group: Saline
Figure 1J						Figure 1K
Sex	Virus	Condition	% timespent Novel	% timespent Familiar		Discrimination score
F	DREADDs	Saline	38.2635	47.0794		-0.1033
F	DREADDs	Saline	25.1812	57.6119		-0.391707
F	DREADDs	Saline	27.9143	55.2704		-0.328859
F	DREADDs	Saline	31.7114	52.3163		-0.245216
F	DREADDs	Saline	31.5807	51.7624		-0.242152
F	DREADDs	Saline	34.2055	55.3287		-0.235924
F	DREADDs	Saline	38.9352	41.5014		-0.0319039
M	DREADDs	Saline	46.5045	47.0044		-0.00534662
M	DREADDs	Saline	54.3455	40.0967		0.150873
M	DREADDs	Saline	38.5936	49.7584		-0.126367
M	DREADDs	Saline	51.5997	43.4844		0.0853487
M	DREADDs	Saline	47.5337	46.5006		0.010987
F	DREADDs	Saline	34.7022	56.7414		-0.241013
F	DREADDs	Saline	33.5305	58.0035		-0.267365
F	DREADDs	Saline	36.7136	54.0372		-0.190892
F	DREADDs	Saline	38.177	56.0323		-0.189529
		Mean	38.0933	50.7831		-0.147023
		SEM	2.05166	1.46845		0.0381852
Novel vs Familiar Food: hM4Di Group: Saline
Figure 1J						Figure 1K
Sex	Virus	Condition	% timespent Novel	% timespent Familiar		Discrimination score
F	DREADDs	CNO	25.9728	58.7368		-0.386779
F	DREADDs	CNO	33.4778	55.4241		-0.24686
F	DREADDs	CNO	24.198	51.704		-0.362389
F	DREADDs	CNO	38.5936	47.5171		-0.103628
F	DREADDs	CNO	35.9553	52.2456		-0.184695
F	DREADDs	CNO	57.882	33.5944		0.265507
F	DREADDs	CNO	49.0459	35.3471		0.162322
M	DREADDs	CNO	53.0206	39.7884		0.142575
M	DREADDs	CNO	47.5263	46.6481		0.00932524
M	DREADDs	CNO	41.4024	52.9213		-0.12212
M	DREADDs	CNO	36.197	58.6701		-0.236891
M	DREADDs	CNO	38.2936	53.816		-0.168521
F	DREADDs	CNO	31.739	62.4865		-0.326318
F	DREADDs	CNO	57.0036	39.0884		0.186438
F	DREADDs	CNO	37.9552	53.3372		-0.168492
F	DREADDs	CNO	29.9475	59.4284		-0.329853
		Mean	39.8882	50.0471		-0.116899
		SEM	2.59556	2.22904		0.0525671
Name	Figure	Test						P value	N
Combined vHPC-LS Food DREADD - Timespent	1J	ANOVA	ANOVA table	SS	DF	MS	F (DFn, DFd)	P value	16
			Saline vs CNO x Novel vs Familiar	25.62	1	25.62	F (1, 30) = 0.4482	P=.508
			Saline vs CNO	4.485	1	4.485	F (1, 30) = 0.07846	P=.781
			Novel vs Familiar	2088	1	2088	F (1, 30) = 23.89	P=3.2E-05
		Sidak PH	NF DREADD Saline					0.00017
		Sidak PH	NF DREADD CNO					0.003
Combined vHPC-LS Food DREADD - Discrimination Score	1K	One sample t-test					t, df	P value (two tailed)	16
		(two-tailed)	Saline - N vs F				t=3.850, df=15	0.0016
			CNO - N vs F				t=2.224, df=15	0.0419

## Sheet: Figure 1L and 1M
Open Field: mCherry Time spent
Figure 1L
	Saline	CNO
	15.9945	14.0691
	24.6771	25.3177
	19.9608	12.5406
	17.6527	10.5158
	21.0857	14.4857
	52.6581	22.2148
	2.47479	56.997
	13.5275	2.26648
	9.10341	7.14077
	13.9727	6.52418
	7.27409	9.49048
	11.7449	9.1534
	8.50825	5.87623
	63.1055	7.84575
	14.9863	2.04141
	9.8446	1.93317
	48.196	52.0748
	44.263	37.6344
	42.9881	53.5872
Mean	23.2641	18.511
SEM	4.07298	4.16212
Open Field: mCherry Velocity
Figure 1M
	Saline	CNO
	3.94682	2.59008
	2.97148	2.04063
	3.70483	2.94188
	2.80938	1.46605
	2.66376	1.39463
	1.96386	1.53598
	0.338112	1.52844
	3.39625	1.25439
	5.47746	3.91506
	3.52887	1.21202
	4.4685	2.19863
	3.74642	4.00233
	2.76698	2.46016
	0.0478333	2.97919
	6.01003	3.12567
	3.21967	2.50013
	8.81839	16.2317
	4.13648	26.3344
	4.23024	23.8907
Mean	3.59186	5.45274
SEM	0.44219	1.7616
Name	Figure	Test						P value	N
Combined vHPC-LS Open Field mCherry - Timespent -Center	1L	Paired t-test (two-tailed)	Saline vs CNO				t, df	P value (two tailed)	19
							t=1.030, df=18	0.3167
Combined vHPC-LS Open Field mCherry - Velocity	1M	Paired t-test (two-tailed)	Saline vs CNO				t, df	P value (two tailed)	19
							t=1.140, df=18	0.2694

## Sheet: Figure 1N and 1O
Open Field: DREADD Time spent
Figure 1N
	Saline	CNO
	22.469	14.2411
	24.2418	18.2519
	22.8273	9.70295
	30.0433	20.1608
	20.54	27.4924
	42.3631	26.4811
	25.0146	30.5141
	5.51621	9.90668
	9.353	9.35716
	11.824	6.01175
	7.7657	4.85376
	2.98184	8.22015
	6.41197	2.8331
	20.335	9.0822
	15.8737	12.0532
	11.6824	2.73727
	24.1522	33.9513
	46.6253	46.9419
	28.4185	29.5421
	24.7771	33.9567
Mean	20.1608	17.8146
SEM	2.60468	2.81716
Open Field: DREADD Velocity
Figure 1O
	3.05877	2.60599
	3.67016	2.88497
	4.19622	1.80456
	3.78653	2.43686
	5.24264	3.78969
	4.41563	11.8378
	2.37735	12.7561
	5.21623	2.10891
	3.66884	2.20262
	2.94525	3.30913
	3.51597	3.29134
	4.23778	2.20238
	2.87397	2.80624
	5.06167	4.81969
	3.78364	3.51
	3.54033	2.05671
	0.0858817	0.345676
	0.221878	0.411131
	0.0980975	0.379045
	0.0801992	0.37645
Mean	3.10385	3.29677
SEM	0.381122	0.740396
Name	Figure	Test						P value	N
Combined vHPC-LS Open Field DREADDs - Timespent -Center	1N	Paired t-test (two-tailed)	Saline vs CNO				t, df	P value (two tailed)	20
							t=1.380, df=19	0.1837
Combined vHPC-LS Open Field DREADD - Velocity	1O	Paired t-test (two-tailed)	Saline vs CNO				t, df	P value (two tailed)	20
							t=0.2719, df=19	0.7886
