# Supplementary material for: A ventral hippocampal-lateral septum pathway regulates social novelty preference
Source: eLife. 2025 Jun 4;13:RP97259. doi: 10.7554/eLife.97259 (PMC12136592; doi:10.7554/eLife.97259)
Supplement: Figure 2—source data 1. [file elife-97259-fig2-data1.xlsx]

## Sheet: Figure 2D-G
Novel vs Familiar Mouse: EYFP controls, Light OFF condition
		Figure 2D			Figure 2E
Virus	Condition	Novel %	Familiar %		Discrimination Score
EYFP	OFF	33.2389	66.4861		-0.333389
EYFP	OFF	54.1455	40.0217		0.149987
EYFP	OFF	42.6302	45.7767		-0.0355909
EYFP	OFF	66.0612	31.0057		0.361147
EYFP	OFF	86.9761	10.5158		0.784274
EYFP	OFF	45.3129	50.5541		-0.0546719
EYFP	OFF	56.362	37.8052		0.197062
EYFP	OFF	46.9128	41.3049		0.0635685
EYFP	OFF	62.6396	29.9783		0.352645
EYFP	OFF	37.5969	56.1203		-0.197653
EYFP	OFF	56.6286	36.0887		0.221533
EYFP	OFF	59.1451	28.4476		0.350457
EYFP	OFF	60.5066	31.4948		0.315341
EYFP	OFF	50.6958	33.9805		0.197402
EYFP	OFF	52.529	39.93		0.136265
EYFP	OFF	59.6984	31.1281		0.314558
EYFP	OFF	49.0876	44.138		0.0530926
EYFP	OFF	46.9794	39.855		0.0820459
EYFP	OFF	50.1166	39.6434		0.116681
EYFP	OFF	48.0253	44.4259		0.0389329
	Mean	53.2644	38.935		0.155684
	SEM	2.5664	2.57188		0.0527521
Novel vs Familiar Mouse: EYFP controls, Novel Light ON condition
		Figure 2D			Figure 2E
EYFP	NON	45.8282	52.1775		-0.0647841
EYFP	NON	48.8367	48.8081		0.000293255
EYFP	NON	47.8953	48.372		-0.00495174
EYFP	NON	77.9858	18.9961		0.608254
EYFP	NON	56.3027	42.2333		0.142785
EYFP	NON	71.767	26.5445		0.459992
EYFP	NON	58.4799	39.1504		0.197987
EYFP	NON	56.098	39.8287		0.1696
EYFP	NON	51.0586	46.7705		0.0438328
EYFP	NON	16.5865	81.3452		-0.661264
EYFP	NON	50.2601	40.0144		0.113495
EYFP	NON	73.1867	22.2461		0.533784
EYFP	NON	72.6381	21.2833		0.546785
EYFP	NON	49.0579	41.7395		0.080601
EYFP	NON	73.107	23.3004		0.516626
EYFP	NON	68.9811	27.5634		0.429001
EYFP	NON	54.6512	41.9011		0.132053
EYFP	NON	54.637	30.2554		0.287206
EYFP	NON	58.4653	33.9984		0.264611
EYFP	NON	47.4928	48.9312		-0.0149179
	Mean	56.6658	38.773		0.189049
	SEM	3.13062	3.23041		0.0653517
Novel vs Familiar Mouse: EYFP controls, Familiarl Light ON condition
		Figure 2D			Figure 2E
EYFP	FON	34.0292	65.6484		-0.317215
EYFP	FON	54.089	45.6321		0.0848054
EYFP	FON	53.9161	44.0656		0.100533
EYFP	FON	88.6929	9.25202		0.811077
EYFP	FON	51.3676	43.9079		0.078296
EYFP	FON	42.0963	53.5154		-0.119432
EYFP	FON	46.6035	49.3602		-0.0287266
EYFP	FON	57.2469	38.0049		0.202012
EYFP	FON	53.8043	37.8197		0.174459
EYFP	FON	67.5359	29.1904		0.396433
EYFP	FON	56.8839	37.4607		0.205875
EYFP	FON	60.1538	34.5571		0.270261
EYFP	FON	64.3638	32.4044		0.330268
EYFP	FON	46.752	42.0913		0.0524599
EYFP	FON	28.8684	69.0124		-0.410131
EYFP	FON	47.7414	46.3081		0.0152397
EYFP	FON	83.0659	11.1362		0.763568
EYFP	FON	47.7625	39.0777		0.100009
EYFP	FON	62.3026	31.003		0.335453
EYFP	FON	50.2	43.1669		0.0753278
	Mean	54.8738	40.1307		0.156029
	SEM	3.17404	3.23098		0.0658033
Novel vs Familiar Mouse: NpHR controls, Light OFF condition
		Figure 2F			Figure 2G
Virus	Condition	Novel %	Familiar %		Discrimination Score
NpHR	OFF	40.0217	54.1455		-0.149987
NpHR	OFF	56.2453	38.3301		0.189427
NpHR	OFF	51.3791	45.6629		0.0589043
NpHR	OFF	56.7222	38.6441		0.189564
NpHR	OFF	57.3108	38.8143		0.192421
NpHR	OFF	50.9915	44.4926		0.0680628
NpHR	OFF	60.3783	38.0635		0.22668
NpHR	OFF	56.6703	34.8388		0.238572
NpHR	OFF	56.9286	36.9386		0.21296
NpHR	OFF	61.5564	29.3701		0.353981
NpHR	OFF	48.8502	47.3588		0.0155019
NpHR	OFF	48.5752	48.7252		-0.00154136
NpHR	OFF	50.4249	44.7092		0.0600806
NpHR	OFF	51.9873	44.5046		0.0775475
NpHR	OFF	53.6122	43.438		0.104834
	Mean	53.4436	41.8691		0.122467
	SEM	1.40831	1.60846		0.0319434
Novel vs Familiar Mouse: NpHR controls, Novel Light ON condition
		Figure 2F			Figure 2G
NpHR	NON	64.3854	32.6278		0.327354
NpHR	NON	62.4087	34.7937		0.284099
NpHR	NON	60.9482	36.3118		0.253305
NpHR	NON	48.9986	49.3801		-0.00387785
NpHR	NON	35.4823	61.1902		-0.265928
NpHR	NON	44.7033	53.2261		-0.0870296
NpHR	NON	61.5578	35.0895		0.273865
NpHR	NON	73.4289	25.1531		0.489703
NpHR	NON	31.0882	63.4785		-0.342512
NpHR	NON	67.1934	28.9564		0.397681
NpHR	NON	36.3292	59.1608		-0.239099
NpHR	NON	40.7304	53.9188		-0.139339
NpHR	NON	62.785	33.6351		0.302322
NpHR	NON	48.7573	51.317		-0.0255776
NpHR	NON	56.3305	37.9585		0.194848
	Mean	53.0085	43.7465		0.0946541
	SEM	3.37955	3.27169		0.0687587
Novel vs Familiar Mouse: NpHR controls, Familiar Light ON condition
		Figure 2F			Figure 2G
NpHR	FON	38.9885	56.186		-0.180695
NpHR	FON	56.4224	41.361		0.154028
NpHR	FON	47.9184	48.9713		-0.0108677
NpHR	FON	45.076	52.0662		-0.0719583
NpHR	FON	55.5902	43.2286		0.125093
NpHR	FON	38.4429	57.7371		-0.200606
NpHR	FON	41.227	55.1273		-0.144262
NpHR	FON	43.6831	52.857		-0.0950275
NpHR	FON	39.7116	56.3648		-0.173333
NpHR	FON	40.1178	57.6121		-0.179007
NpHR	FON	51.1268	41.7542		0.10091
NpHR	FON	30.862	64.291		-0.351319
NpHR	FON	63.371	35.0549		0.287689
NpHR	FON	66.9639	29.8781		0.382952
NpHR	FON	51.7473	45.0937		0.0687062
	Mean	47.4166	49.1722		-0.0191798
	SEM	2.59424	2.46027		0.0521773
STATS
Name	Figure	Test						P value	N
vHPC-LS EYFP SDT Time spent	2D	ANOVA	ANOVA table	SS	DF	MS	F (DFn, DFd)	P value	20
			OFF vs ON x N vs F	75.97	2	37.98	F (2, 57) = 0.1074	P=.898
			OFF vs ON	61.83	2	30.92	F (2, 57) = 5.010	P=.010
			N vs F	7352	1	7352	F (1, 57) = 20.80	P=2.8E-05
		Multiple comparison						Adjusted P Value
		Sidak PH	OFF					0.032
		Sidak PH	N ON					0.012
		Sidak PH	F ON					0.032
vHPC-LS EYFP SDT Discrimination Score	2E	One Sample t-test (two tailed)					t, df	P value (two tailed)	20
		OFF					t=2.951, df=19	0.008
		Novel On					t=2.893, df=19	0.009
		Familiar ON					t=2.371, df=19	0.028
vHPC-LS NpHR SDT Time spent	2F	ANOVA	ANOVA table	SS	DF	MS	F (DFn, DFd)	P value	15
			On vs OFF x Novel vs Familiar	761.1	2	380.5	F (2, 56) = 3.988	P=.024
			On vs OFF	9.341	2	4.67	F (2, 56) = 0.04894	P=.952
			Novel vs Familiar	910.2	1	910.2	F (1, 28) = 8.649	P=.006
		Multiple comparison						Adjusted P Value
		Sidak PH	OFF					0.006
		Sidak PH	N ON					0.037
		Sidak PH	F ON					0.949
vHPC-LS NpHR SDT Discrimination Score	2G	One Sample t-test (two tailed)					t, df	P value (two tailed)	15
		OFF					t=3.834, df=14	0.002
		Novel On					t=1.377, df=14	0.19
		Familiar ON					t=0.3676, df=14	0.719

## Sheet: Figure 2H-K
Novel vs Novel Mouse: EYFP controls, Light OFF condition
		Figure 2H			Figure 2I
Virus	Condition	Novel % OFF	Novel % OFF		Discrimination Score
EYFP	OFF	43.463	55.462		-0.121294
EYFP	OFF	51.883	45.9007		0.0611793
EYFP	OFF	30.3081	68.9509		-0.389313
EYFP	OFF	90.035	6.69888		0.861499
EYFP	OFF	54.3538	43.5464		0.110392
EYFP	OFF	51.5957	47.1461		0.0450633
EYFP	OFF	57.1821	37.0772		0.213294
EYFP	OFF	56.9822	36.244		0.222451
EYFP	OFF	35.6387	57.9785		-0.238629
EYFP	OFF	23.0981	65.0446		-0.475893
EYFP	OFF	59.695	37.5219		0.228079
EYFP	OFF	69.4884	26.0207		0.455116
EYFP	OFF	46.9211	44.9963		0.020941
EYFP	OFF	47.5127	47.9627		-0.00471286
EYFP	OFF	50.3958	48.5043		0.0191255
EYFP	OFF	36.6606	59.1735		-0.234916
EYFP	OFF	63.1031	33.4389		0.307267
EYFP	OFF	45.1296	49.9292		-0.0504909
EYFP	OFF	62.5781	35.6137		0.27461
EYFP	OFF	41.7382	56.9369		-0.154028
	Mean	50.8881	45.2074		0.057487
	SEM	3.3096	3.20076		0.0678617
Novel vs Novel Mouse: EYFP controls, Light ON condition
		Figure 2H			Figure 2I
Virus	Condition	Novel % OFF	Novel % ON		Discrimination Score
EYFP	NON	18.6041	80.5276		-0.624659
EYFP	NON	69.525	29.3228		0.406708
EYFP	NON	62.4718	34.1207		0.293513
EYFP	NON	67.661	29.5569		0.391946
EYFP	NON	54.5233	43.4393		0.113145
EYFP	NON	40.6302	56.4995		-0.163383
EYFP	NON	32.0399	66.945		-0.35263
EYFP	NON	37.088	59.384		-0.231114
EYFP	NON	30.1456	59.0262		-0.323876
EYFP	NON	25.8615	71.5658		-0.469112
EYFP	NON	35.611	59.772		-0.253304
EYFP	NON	55.3922	38.7898		0.17628
EYFP	NON	34.3104	55.8582		-0.238973
EYFP	NON	51.8295	42.8367		0.0949946
EYFP	NON	31.2585	54.6044		-0.271897
EYFP	NON	37.8312	55.5113		-0.18941
EYFP	NON	42.3752	51.4279		-0.0965071
EYFP	NON	47.1018	39.6655		0.0857036
EYFP	NON	32.0006	62.5283		-0.322945
EYFP	NON	45.4486	49.601		-0.0436868
	Mean	42.5855	52.0491		-0.10096
	SEM	3.12269	3.06806		0.0634071
Novel vs Novel Mouse: NpHR controls, Light OFF condition
		Figure 2H			Figure 2I
Virus	Condition	Novel % OFF	Novel % OFF		Discrimination Score
NpHR	OFF	31.7323	59.4972		-0.304341
NpHR	OFF	31.9057	66.1445		-0.349197
NpHR	OFF	41.1049	56.5036		-0.15776
NpHR	OFF	68.0777	30.5808		0.380068
NpHR	OFF	49.2376	50.2458		-0.0101349
NpHR	OFF	60.9533	37.9968		0.232
NpHR	OFF	45.8962	51.0041		-0.052713
NpHR	OFF	54.9288	40.7383		0.148332
NpHR	OFF	26.5811	62.9781		-0.406401
NpHR	OFF	38.8384	52.3873		-0.14852
NpHR	OFF	49.1542	43.938		0.0560329
NpHR	OFF	45.0925	52.0247		-0.0713795
NpHR	OFF	57.7619	37.8052		0.208824
NpHR	OFF	62.9448	34.7138		0.289078
NpHR	OFF	44.9925	50.3249		-0.0559441
	Mean	47.2801	48.4589		-0.0161371
	SEM	3.13845	2.72817		0.061119
Novel vs Novel Mouse: NpHR controls, Light ON condition
		Figure 2H			Figure 2I
Virus	Condition	Novel % OFF	Novel % ON		Discrimination Score
NpHR	NON	37.8697	60.4322		-0.229523
NpHR	NON	42.426	54.9967		-0.129032
NpHR	NON	43.5073	54.044		-0.108012
NpHR	NON	24.263	74.9141		-0.510714
NpHR	NON	27.1495	70.4417		-0.443608
NpHR	NON	35.3353	63.207		-0.282839
NpHR	NON	79.0266	29.6687		0.454094
NpHR	NON	54.6754	42.778		0.122084
NpHR	NON	47.9997	44.3497		0.0395236
NpHR	NON	27.1192	72.5993		-0.456085
NpHR	NON	52.1701	41.7264		0.111225
NpHR	NON	43.317	54.1078		-0.11076
NpHR	NON	27.5702	69.8473		-0.433978
NpHR	NON	41.34	55.2699		-0.144188
NpHR	NON	25.4251	73.5385		-0.486172
	Mean	40.6129	57.4614		-0.173866
	SEM	3.74663	3.51684		0.0712468
STATS
Name	Figure	Test						P value	N
vHPC-LS EYFP Novel Novel Time spent	2H	ANOVA	ANOVA table	SS	DF	MS	F (DFn, DFd)	P value	20
			OFF vs ON x Novel 1vs Novel2	1147	1	1147	F (1, 38) = 8.462	P=.006
			OFF vs ON	10.67	1	10.67	F (1, 38) = 0.07874	P=.781
			Novel 1vs Novel2	71.55	1	71.55	F (1, 38) = 0.2669	P=.608
		Multiple comparison						Adjusted P Value	20
		Sidak PH	OFF					0.376
		Sidak PH	N-ON					0.075
vHPC-LS EYFP Novel Novel Discrimination Score	2I	One sample t-test					t, df	P value (two tailed)
		(two-tailed)	OFF				t=0.6321, df=19	0.535
			N-ON				t=1.592, df=19	0.128
vHPC-LS NpHR Novel Novel Time spent	2J	ANOVA	ANOVA table	SS	DF	MS	F (DFn, DFd)	P value	15
			On Vs OFF x Novel vs Novel	920.8	1	920.8	F (1, 28) = 4.622	P=.040
			On Vs OFF	20.45	1	20.45	F (1, 28) = 0.1027	P=.751
			Novel vs Novel	1219	1	1219	F (1, 28) = 9.481	P=.005
		Multiple comparison						Adjusted P Value	15
		Sidak PH	OFF					0.961
		Sidak PH	N-ON					0.001
vHPC-LS NpHR Novel Novel Discrimination score	2K	One sample t-test					t, df	P value (two tailed)	15
		(two-tailed)	OFF				t=0.2640, df=14	0.796
			N-ON				t=2.440, df=14	0.029

## Sheet: Figure 2L-O
Novel vs Novel Object: EYFP controls, Light OFF condition
		Figure 2L			Figure 2M
Virus	Condition	Novel Object% OFF	Novel Object % OFF		Discrimination Score
EYFP	OFF	19.59	77.1436		-0.594969
EYFP	OFF	13.6561	69.3218		-0.67085
EYFP	OFF	60.12	34.5721		0.269799
EYFP	OFF	34.8554	59.495		-0.26115
EYFP	OFF	76.3839	20.2648		0.580651
EYFP	OFF	74.9208	20.4299		0.571479
EYFP	OFF	45.8045	37.8885		0.0945838
EYFP	OFF	46.8378	41.9215		0.0553887
EYFP	OFF	18.4651	77.9185		-0.616841
EYFP	OFF	71.988	26.6039		0.460323
EYFP	OFF	56.0037	42.4465		0.137706
EYFP	OFF	41.1882	48.7543		-0.0841208
EYFP	OFF	68.3636	27.3704		0.428198
EYFP	OFF	61.8115	34.8221		0.279296
	Mean	49.2849	44.2109		0.0463924
	SEM	5.73373	5.27669		0.116507
Novel vs Novel Object: EYFP controls, Light ON condition
		Figure 2L			Figure 2M
Virus	Condition	Novel Object% OFF	Novel Object % ON		Discrimination Score
EYFP	NON	77.8802	19.7203		0.595897
EYFP	NON	64.2726	33.3056		0.317356
EYFP	NON	53.3203	36.6293		0.18556
EYFP	NON	31.5933	62.1344		-0.325849
EYFP	NON	56.6293	39.7348		0.175319
EYFP	NON	51.966	46.1532		0.0592415
EYFP	NON	66.4332	29.6135		0.383351
EYFP	NON	60.4734	34.5969		0.272183
EYFP	NON	23.5106	72.3981		-0.509729
EYFP	NON	39.3462	51.8321		-0.136939
EYFP	NON	57.4694	36.5678		0.222269
EYFP	NON	44.3732	44.0446		0.0037168
EYFP	NON	41.176	43.8887		-0.0318894
EYFP	NON	34.1489	59.662		-0.271963
	Mean	50.1852	43.5915		0.0670375
	SEM	4.053	3.75871		0.0809207
Novel vs Novel Object: NpHR controls, Light OFF condition
		Figure 2N			Figure 2O
Virus	Condition	Novel Object%	Novel Object %		Discrimination Score
NpHR	OFF	40.0767	53.5161		-0.143595
NpHR	OFF	36.9053	59.0534		-0.230809
NpHR	OFF	90.8349	5.34078		0.888937
NpHR	OFF	30.6032	64.7142		-0.357867
NpHR	OFF	27.1477	71.0024		-0.446812
NpHR	OFF	47.4544	45.8545		0.0171459
NpHR	OFF	37.5302	59.4784		-0.22625
NpHR	OFF	40.255	52.004		-0.127348
NpHR	OFF	47.5294	44.8629		0.02886
NpHR	OFF	71.4357	26.1812		0.463594
NpHR	OFF	30.7974	64.228		-0.351806
	Mean	45.5063	49.6578		-0.0441774
	SEM	5.80364	5.76218		0.119756
Novel vs Novel Object: NpHR controls, Light OFF condition
		Figure 2N			Figure 2O
Virus	Condition	Novel Object%	Novel Object %		Discrimination Score
NpHR	NON	49.6895	43.0196		0.0719443
NpHR	NON	7.11515	92.109		-0.856584
NpHR	NON	25.08	70.8553		-0.477148
NpHR	NON	69.3369	23.4384		0.494728
NpHR	NON	66.4062	29.3447		0.387061
NpHR	NON	49.7328	41.7085		0.0877535
NpHR	NON	59.5803	34.319		0.269025
NpHR	NON	37.6091	57.2987		-0.20746
NpHR	NON	61.2256	33.7852		0.288814
NpHR	NON	38.7313	54.3192		-0.167521
NpHR	NON	44.5774	49.5603		-0.0529328
	Mean	46.2804	48.1598		-0.0147564
	SEM	5.62373	6.0313		0.120459
STATS
Name	Figure	Test						P value	N
vHPC-LS EYFP Novel Object Time spent	2L		ANOVA table	SS	DF	MS	F (DFn, DFd)	P value	14
			ON vs OFF x Novel vs Novel	8.083	1	8.083	F (1, 26) = 0.02399	P=.878
			ON vs OFF	0.2762	1	0.2762	F (1, 26) = 0.0008197	P=.977
			Novel vs Novel	476.5	1	476.5	F (1, 26) = 1.578	P=.220
		Multiple comparison						Adjusted P Value	14
		Sidak PH	OFF					0.704
		Sidak PH	N-ON					0.556
vHPC-LS EYFP Novel Object Discrimination Score	2M	One sample t-test					t, df	P value (two tailed)	14
		(two-tailed)	OFF				t=0.3982, df=13	0.697
			ON				t=0.8284, df=13	0.422
vHPC-LS NpHR Novel Object Time spent	2N	ANOVA	ANOVA table	SS	DF	MS	F (DFn, DFd)	P value	11
			ON vs OFF x Novel	14.2	1	14.2	F (1, 20) = 0.02704	P=.871
			ON vs OFF	1.441	1	1.441	F (1, 20) = 0.002745	P=.959
			Novel	100	1	100	F (1, 20) = 0.4612	P=.505
		Multiple comparison						Adjusted P Value	11
		Sidak PH	OFF					0.853
		Sidak PH	N-ON					0.968
vHPC-LS NpHR Novel Object Discrimination Score	2O	One sample t-test					t, df	P value (two tailed)	11
		(two-tailed)	OFF				t=0.3689, df=10	0.72
			ON				t=0.1225, df=10	0.905

## Sheet: Figure 2P-S
EYFP Open Field					EYFP Open Field
Time spent					Velocity
Virus	OFF	ON	OFF		Virus	OFF	ON	OFF
EYFP	6.38367	8.20757	12.6886		EYFP	3.92178	2.06584	2.24107
EYFP	2.18951	2.71259	4.03648		EYFP	3.40707	3.26111	2.33547
EYFP	3.94408	3.56911	2.62476		EYFP	5.10951	2.73769	2.35503
EYFP	1.75447	1.47671	4.18943		EYFP	4.27595	2.72431	1.79859
EYFP	3.81446	4.13851	9.10564		EYFP	3.83879	1.89201	1.60647
EYFP	0.717261	1.49468	0.749653		EYFP	3.2294	2.37322	1.18497
EYFP	8.78622	7.60578	14.1746		EYFP	9.34755	11.9887	9.13004
EYFP	6.08768	12.9392	20.3324		EYFP	6.89033	7.54533	5.99746
EYFP	15.1097	17.7067	18.0122		EYFP	10.458	12.0914	15.8176
EYFP	9.78195	8.08759	17.7908		EYFP	14.4238	8.52474	8.18117
EYFP	7.34191	15.7995	13.8367		EYFP	36.4502	25.0558	19.6512
EYFP	11.7026	22.4146	9.60096		EYFP	19.5999	8.73098	6.18297
EYFP	11.698	15.9013	19.4334		EYFP	33.9713	24.0852	18.2712
EYFP	12.128	14.3591	17.5439		EYFP	31.977	24.8087	15.126
EYFP	9.06356	19.1223	16.1135		EYFP	43.637	27.63	27.4616
EYFP	17.878	16.1281	17.4613		EYFP	34.6372	21.6793	15.0236
EYFP	13.9154	15.7578	14.8412		EYFP	28.3041	36.2238	33.1105
EYFP	10.7629	14.1098	14.8736		EYFP	6.8215	4.21196	4.83474
EYFP	12.3229	12.0637	14.7718		EYFP	7.97699	5.98227	5.07463
EYFP	12.647	13.6561	14.6468		EYFP	10.0174	4.32173	7.59509
Mean	8.90146	11.3625	12.8414		Mean	15.9147	11.8967	10.149
SEM	1.0645	1.40238	1.30818		SEM	3.02974	2.37603	2.03241
NpHR Open Field					NpHR Open Field
Time spent					Velocity
Virus	OFF	ON	OFF		Virus	OFF	ON	OFF
NpHR	3.29599	3.98111	2.44422		NpHR	2.59868	2.49202	2.26158
NpHR	0.291518	0.231364	0.749618		NpHR	4.32453	2.44185	1.81107
NpHR	1.88871	4.2172	0.504583		NpHR	2.04795	0.949312	0.593782
NpHR	2.88279	2.70695	6.26996		NpHR	4.12063	3.06267	2.73579
NpHR	1.82853	2.06462	4.97639		NpHR	2.77498	2.37729	2.15716
NpHR	2.18035	7.35117	6.26794		NpHR	2.79319	2.56979	1.49382
NpHR	1.24988	1.1249	2.06925		NpHR	2.45354	1.86775	3.08998
NpHR	10.6749	13.0081	14.2579		NpHR	3.88247	4.44195	5.33784
NpHR	12.0406	16.2253	10.6564		NpHR	9.79405	10.0168	17.0599
NpHR	6.36978	7.61504	5.67077		NpHR	3.7411	3.73742	3.528
NpHR	5.10138	8.14276	10.7536		NpHR	3.95638	6.16404	6.82232
NpHR	12.8321	17.0632	19.9102		NpHR	5.22803	4.22607	4.07073
NpHR	8.20294	10.7953	17.0586		NpHR	12.3201	11.3684	15.1996
NpHR	7.90631	12.364	16.0117		NpHR	2.74702	4.04467	11.4717
NpHR	9.79539	11.9387	20.3731		NpHR	12.9762	7.10233	4.82012
Mean	5.76941	7.92199	9.19829		Mean	5.05059	4.45749	5.49689
SEM	1.0892	1.41265	1.7846		SEM	0.928937	0.77488	1.31
STATS
Name	Figure	Test						P value	N
vHPC-LS EYFP Open Field Time spent	2P	ANOVA	ANOVA table	SS	DF	MS	F (DFn, DFd)	P value	20
			Treatment (between columns)	158.4	2	79.22	F (2, 57) = 2.470	P=.094
			Residual (within columns)	1828	57	32.07
		Multiple comparison						Adjusted P Value	20
		Sidak PH	ON vs. OFF					0.438
		Sidak PH	OFF vs. OFF					0.093
		Sidak PH	OFF vs. ON					0.797
vHPC-LS EYFP Open Field Velocity	2Q	ANOVA	ANOVA table	SS	DF	MS	F (DFn, DFd)	P value	20
			Treatment (between columns)	349.6	2	174.8	F (2, 57) = 1.383	P=.259
			Residual (within columns)	7203	57	126.4
		Multiple comparison						Adjusted P Value	20
		Sidak PH	ON vs. OFF					0.6
		Sidak PH	OFF vs. OFF					0.296
		Sidak PH	OFF vs. ON					0.947
vHPC-LS NpHR Open Field Time spent	2R	ANOVA	ANOVA table	SS	DF	MS	F (DFn, DFd)	P value	15
			Treatment (between columns)	90.1	2	45.05	F (2, 42) = 1.415	P=.254
			Residual (within columns)	1337	42	31.83
		Multiple comparison						Adjusted P Value	15
		Sidak PH	ON vs. OFF					0.66
		Sidak PH	OFF vs. OFF					0.279
		Sidak PH	OFF vs. ON					0.902
vHPC-LS NpHR Open Field Velocity	2S	ANOVA	ANOVA table	SS	DF	MS	F (DFn, DFd)	P value	15
			Treatment (between columns)	8.157	2	4.078	F (2, 42) = 0.2565	P=.775
			Residual (within columns)	667.7	42	15.9
		Multiple comparison						Adjusted P Value	15
		Sidak PH	ON vs. OFF					0.969
		Sidak PH	OFF vs. OFF					0.986
		Sidak PH	OFF vs. ON					0.859
