# Supplementary material for: A ventral hippocampal-lateral septum pathway regulates social novelty preference
Source: eLife. 2025 Jun 4;13:RP97259. doi: 10.7554/eLife.97259 (PMC12136592; doi:10.7554/eLife.97259)
Supplement: Figure 3—source data 1. [file elife-97259-fig3-data1.xlsx]

## Sheet: Figure 3H
Figure 3 H
	HPF	Isocortex	HY	TH
Mouse 1	46.7379	16.2219	10.99	4.88257
Mouse 2	28.8508	32.8574	7.71423	8.8993
Mouse 3	28.6711	14.9083	18.774	5.53915
Mean	34.7533	21.3292	12.4928	6.44034
SEM	5.99255	5.77657	3.27992	1.244
STATS
Name	Figure	Test						P value	N
% total input	3H	ANOVA	ANOVA table	SS	DF	MS	F (DFn, DFd)	P value	3
			Treatment (between columns)	1360	3	453.4	F (3, 8) = 7.410	P=0.0107
			Residual (within columns)	489.5	8	61.19
			Total	1850	11
		Multiple comparison						Adjusted P Value
Wholebrain		Dunnett's multiple comparisons test	HPF vs. Isocortex					0.1579
			HPF vs. HY					0.0206
			HPF vs. TH					0.0056

## Sheet: Figure 3I
	Figure 3 H
	HPF Comparisons
	CA1	CA3	DG	SUBd	SUBv
Mouse 1	12.1938	28.4494	0.429329	0.719758	2.49179
Mouse 2	13.3179	9.07706	1.05245	1.85379	2.60715
Mouse 3	13.0559	9.43624	0.371365	0.903803	3.39597
Mean	12.8559	15.6542	0.617716	1.15912	2.83164
SEM	0.339572	6.39841	0.218012	0.351375	0.284126
STATS
Name	Figure	Test						P value	N
% total input	3I	ANOVA	ANOVA table	SS	DF	MS	F (DFn, DFd)	P value	3
			Treatment (between columns)	602.1	4	150.5	F (4, 10) = 6.074	P=0.0096
			Residual (within columns)	247.8	10	24.78
			Total	850	14
		Multiple comparison						Adjusted P Value
HPF Comparisons		Dunnett's multiple comparisons test	Dunnett's multiple comparisons test
			CA1 vs. CA3					0.8938
			CA1 vs. DG					0.0411
			CA1 vs. SUBd					0.0511
			CA1 vs. SUBv					0.0995
			CA3 vs. DG					0.0134
			CA3 vs. SUBd					0.0166
			CA3 vs. SUBv					0.0325

## Sheet: Figure 3J
Figure 3 J
dCA1 vs vCA1 Comparisons
	dCA1	vCA1
Mouse 1	3.99105	9.06488
Mouse 2	4.8994	7.29439
Mouse 3	5.1494	8.16851
Mean	4.67995	8.17592
SEM	0.35193	0.51111
STATS
Name	Figure	Test						P value	N
dCA1 vs vCA1	3J	Paired t test							3
								P value
			P value summary	*				0.0496
			Significantly different (P < 0.05)?	Yes
			One- or two-tailed P value?	Two-tailed
			t, df	t=4.320, df=2
			Number of pairs	3

## Sheet: Figure 3K
Figure 3 K
dCA3 vs vCA3 Comparisons
	dCA3	vCA3
Mouse 1	3.53468	5.41834
Mouse 2	15.4348	11.2341
Mouse 3	1.91586	6.89032
Mean	6.96178	7.84759
SEM	4.26221	1.74576
STATS
Name	Figure	Test						P value	N
dCA3 vs vCA3	3K	Paired t test							3
								P value
			P value summary	ns				0.7736
			Significantly different (P < 0.05)?	No
			One- or two-tailed P value?	Two-tailed
			t, df	t=0.3287, df=2
			Number of pairs	3
