# Supplementary material for: A ventral hippocampal-lateral septum pathway regulates social novelty preference
Source: eLife. 2025 Jun 4;13:RP97259. doi: 10.7554/eLife.97259 (PMC12136592; doi:10.7554/eLife.97259)
Supplement: Figure 4—source data 1. [file elife-97259-fig4-data1.xlsx]

## Sheet: LS-VTA DREADDS SDT
Novel vs Familiar Mouse: mCherry controls, Saline
		Figure 4D			Figure 4E
Virus	Condition	SDT NF Novel %	SDT NF Familiar %		Discrimination Scores
mCherry	Saline	40.5399	57.1524		-0.170049
mCherry	Saline	55.2287	40.58		0.152896
mCherry	Saline	35.647	60.3366		-0.257227
mCherry	Saline	53.891	32.5196		0.247324
mCherry	Saline	60.1617	30.4975		0.327206
mCherry	Saline	77.7704	15.6724		0.664556
mCherry	Saline	69.9108	24.223		0.48535
mCherry	Saline	51.3291	31.1891		0.244067
mCherry	Saline	52.4302	29.6198		0.278006
mCherry	Saline	47.2338	40.135		0.0812512
mCherry	Saline	74.8209	18.9885		0.595168
	Mean	56.2694	34.6285		0.240777
	SEM	4.05408	4.26894		0.086543
Novel vs Familiar Mouse: mCherry controls, CNO
		Figure 4D			Figure 4E
Virus	Condition	SDT NF Novel %	SDT NF Familiar %		Discrimination Scores
mCherry	CNO	48.4043	44.9129		0.0374141
mCherry	CNO	53.1828	40.6182		0.133949
mCherry	CNO	53.3122	40.6049		0.135303
mCherry	CNO	27.9477	43.4714		-0.217361
mCherry	CNO	50.0458	37.5552		0.142585
mCherry	CNO	76.7039	15.764		0.659038
mCherry	CNO	58.3618	37.0136		0.223834
mCherry	CNO	48.8376	45.4712		0.0356954
mCherry	CNO	55.9703	37.7885		0.193921
mCherry	CNO	50.6124	42.1882		0.0907785
mCherry	CNO	69.2692	22.8398		0.504071
	Mean	53.8771	37.1116		0.176293
	SEM	3.73715	2.83089		0.0706459
Novel vs Familiar Mouse: DREADDs, Saline
		Figure 4F			Figure 4G
Virus	Condition	SDT NF Novel %	SDT NF Familiar %		Discrimination Scores
DREADDs	Saline	74.6438	21.5649		0.551706
DREADDs	Saline	58.2236	25.0208		0.398859
DREADDs	Saline	75.6291	15.1558		0.666116
DREADDs	Saline	60.4459	31.5413		0.314225
DREADDs	Saline	51.3374	42.9798		0.0886121
DREADDs	Saline	47.2794	42.8048		0.0496716
DREADDs	Saline	38.5968	48.8043		-0.116789
DREADDs	Saline	50.6791	38.9468		0.130904
DREADDs	Saline	51.2291	41.7715		0.101693
DREADDs	Saline	53.7994	27.8204		0.318293
	Mean	56.1864	33.641		0.250329
	SEM	3.67247	3.48887		0.0768849
Novel vs Familiar Mouse: DREADDs, Saline
		Figure 4F			Figure 4G
Virus	Condition	SDT NF Novel %	SDT NF Familiar %		Discrimination Scores
DREADDs	CNO	57.9987	37.0355		0.220586
DREADDs	CNO	64.8363	25.6729		0.432701
DREADDs	CNO	29.9533	63.3561		-0.357978
DREADDs	CNO	33.811	61.4814		-0.290373
DREADDs	CNO	38.4135	56.112		-0.187236
DREADDs	CNO	36.7772	56.3073		-0.20981
DREADDs	CNO	52.7579	38.4436		0.156952
DREADDs	CNO	19.84	72.7689		-0.571531
DREADDs	CNO	47.6044	48.8626		-0.0130431
DREADDs	CNO	24.8542	68.8885		-0.469736
	Mean	40.6846	52.8929		-0.128947
	SEM	4.64837	4.79999		0.101831
Name	Figure	Test						P value	N
Combined LS-VTA SDT mCherry - Timespent	4D	ANOVA	ANOVA table	SS	DF	MS	F (DFn, DFd)	P value	11
			Saline vs CNO x Novel vs Familiar	65.37	1	65.37	F (1, 20) = 1.098	P=.307
			Saline vs CNO	0.02268	1	0.02268	F (1, 20) = 0.0003810	P=.985
			Novel vs Familiar	4056	1	4056	F (1, 20) = 16.10	P=6.8E-04
		Sidak PH	NF mCherry Saline					0.00022
		Sidak PH	NF mCherry CNO					0.0031
Combined LS-VTA SDT mCherry - Discrimination Score	4E	One sample t-test					t, df	P value (two tailed)	11
		(two-tailed)	Saline - N vs F				t=2.288, df=10	0.045
			CNO - N vs F				t=2.495, df=10	0.032
Combined LS-VTA SDT DREADD - Timespent	4F	ANOVA	ANOVA table	SS	DF	MS	F (DFn, DFd)	P value	10
			Saline vs CNO x Novel vs Familiar	3020	1	3020	F (1, 18) = 17.85	P=5.1E-04
			Saline vs CNO	35.16	1	35.16	F (1, 18) = 0.2079	P=.654
			Novel vs Familiar	267.1	1	267.1	F (1, 18) = 1.465	P=.242
		Sidak PH	NF DREADD Saline					0.001
		Sidak PH	NF DREADD CNO					0.091
Combined LS-VTA SDT DREADD - Discrimination Score	4G	One sample t-test					t, df	P value (two tailed)
		(two-tailed)	Saline - N vs F				t=3.112, df=9	0.012	10
			CNO - N vs F				t=1.356, df=9	0.208

## Sheet: LS-VTA DREADDs Food
Novel vs Familiar Food: mCherry controls, Saline
		Figure 4H			Figure 4I
Virus	Condition	SDT NF Food Novel %	SDT NF Food Familiar %		Discrimination Score
mCherry	Saline	28.0287	67.5971		-0.413784
mCherry	Saline	37.5219	56.6036		-0.202727
mCherry	Saline	49.9	47.6837		0.0227117
mCherry	Saline	39.5017	50.8832		-0.125922
mCherry	Saline	31.2531	57.7904		-0.298026
mCherry	Saline	19.7067	75.2271		-0.584833
mCherry	Saline	21.2232	72.244		-0.545868
mCherry	Saline	33.6527	48.6252		-0.181975
mCherry	Saline	38.2968	48.8043		-0.120635
mCherry	Saline	46.8294	43.1714		0.0406444
	Mean	34.5914	56.863		-0.241041
	SEM	3.13743	3.54376		0.0687846
Novel vs Familiar Food: mCherry controls, CNO
		Figure 4H			Figure 4I
Virus	Condition	SDT NF Food Novel %	SDT NF Food Familiar %		Discrimination Score
mCherry	CNO	43.7464	51.779		-0.0840893
mCherry	CNO	39.1551	57.0619		-0.186109
mCherry	CNO	49.0376	45.7379		0.0348162
mCherry	CNO	1.39155	94.4755		-0.970969
mCherry	CNO	52.3286	41.2064		0.11891
mCherry	CNO	23.3211	71.3881		-0.507522
mCherry	CNO	47.3504	43.4594		0.042848
mCherry	CNO	39.2502	52.1249		-0.140899
mCherry	CNO	39.6384	49.4459		-0.110093
mCherry	CNO	16.8805	75.2458		-0.633535
	Mean	35.21	58.1925		-0.243664
	SEM	5.13918	5.3726		0.110497
Novel vs Familiar Food: DREADD controls, Saline
		Figure 4J			Figure 4K
Virus	Condition	SDT NF Food Novel %	SDT NF Food Familiar %		Discrimination Score
DREADDs	Saline	37.6489	50.2624		-0.14348
DREADDs	Saline	49.0418	37.2021		0.137281
DREADDs	Saline	15.8404	80.6683		-0.671732
DREADDs	Saline	33.5555	56.4786		-0.254604
DREADDs	Saline	35.1387	56.0537		-0.229349
DREADDs	Saline	39.6717	50.6624		-0.121668
DREADDs	Saline	45.0925	38.1103		0.0839175
DREADDs	Saline	47.0377	51.3791		-0.0441114
DREADDs	Saline	34.061	60.5149		-0.279711
	Mean	37.4543	53.4813		-0.169273
	SEM	3.3096	4.29504		0.0792526
Virus	Condition	SDT NF Food Novel %	SDT NF Food Familiar %		Discrimination Score
DREADDs	CNO	53.6122	39.5634		0.150778
DREADDs	CNO	78.2703	2.77454		0.931531
DREADDs	CNO	26.5478	68.8943		-0.443688
DREADDs	CNO	27.9893	55.562		-0.330009
DREADDs	CNO	25.3562	59.3534		-0.401338
DREADDs	CNO	30.9782	52.183		-0.254984
DREADDs	CNO	50.3541	32.8389		0.210537
DREADDs	CNO	32.8695	66.7139		-0.339859
DREADDs	CNO	82.1015	11.5907		0.752579
	Mean	45.3421	43.2749		0.0306163
	SEM	7.40186	7.87175		0.172406

## Sheet: LS-VTA DREADDs OpenField
Virus	Condition	Open Field % Time Center				Virus	Condition	OF Avg Velocity
mCherry	Saline	5.26228				mCherry	Saline	4.85404
mCherry	Saline	9.81127				mCherry	Saline	0.418855
mCherry	Saline	9.92001				mCherry	Saline	6.71939
mCherry	Saline	21.0399				mCherry	Saline	2.57867
mCherry	Saline	49.5334				mCherry	Saline	5.34335
mCherry	Saline	18.2776				mCherry	Saline	7.86625
mCherry	Saline	34.0638				mCherry	Saline	5.02964
mCherry	Saline	27.4644				mCherry	Saline	3.33986
		21.9216						4.51876
Virus	Condition	Open Field % Time Center				Virus	Condition	OF Avg Velocity
mCherry	CNO	10.2616				mCherry	CNO	3.58959
mCherry	CNO	7.94934				mCherry	CNO	0.431004
mCherry	CNO	5.05791				mCherry	CNO	1.48801
mCherry	CNO	34.7207				mCherry	CNO	2.1903
mCherry	CNO	21.5047				mCherry	CNO	2.44155
mCherry	CNO	18.2617				mCherry	CNO	6.1053
mCherry	CNO	7.72436				mCherry	CNO	5.94809
mCherry	CNO	13.8566				mCherry	CNO	2.52194
		14.9171						3.08947
Virus	Condition	Open Field % Time Center				Virus	Condition	OF Avg Velocity
DREADDs	Saline	34.8096				DREADDs	Saline	3.46766
DREADDs	Saline	27.656				DREADDs	Saline	4.57909
DREADDs	Saline	33.6597				DREADDs	Saline	5.04416
DREADDs	Saline	44.3546				DREADDs	Saline	3.59321
DREADDs	Saline	7.58687				DREADDs	Saline	4.18714
DREADDs	Saline	19.1859				DREADDs	Saline	3.62002
DREADDs	Saline	45.9651				DREADDs	Saline	4.57048
		30.4597						4.15168
Virus	Condition	Open Field % Time Center				Virus	Condition	OF Avg Velocity
DREADDs	CNO	32.0473				DREADDs	CNO	2.01079
DREADDs	CNO	26.6519				DREADDs	CNO	4.57598
DREADDs	CNO	40.5616				DREADDs	CNO	5.03738
DREADDs	CNO	53.6955				DREADDs	CNO	3.59206
DREADDs	CNO	10.0283				DREADDs	CNO	4.186
DREADDs	CNO	14.9904				DREADDs	CNO	14.3354
DREADDs	CNO	59.2951				DREADDs	CNO	0.0409601
		33.8957						4.82551

## Sheet: Figure 4 stats
Name	Figure	Test						P value	N
Combined LS-VTA SDT mCherry - Timespent	4D	ANOVA	ANOVA table	SS	DF	MS	F (DFn, DFd)	P value	11
			Saline vs CNO x Novel vs Familiar	65.37	1	65.37	F (1, 20) = 1.098	P=.307
			Saline vs CNO	0.02268	1	0.02268	F (1, 20) = 0.0003810	P=.985
			Novel vs Familiar	4056	1	4056	F (1, 20) = 16.10	P<.001
		Sidak PH	NF mCherry Saline					<.001	11
		Sidak PH	NF mCherry CNO					0.003
Combined LS-VTA SDT mCherry - Discrimination Score	4E	t-test (two-tailed)	Saline vs CNO				t, df	P value (two tailed)	11
							t=0.2295, df=10	0.8231
		One sample t-test					t, df	P value (two tailed)
		(two-tailed)	Saline - N vs F				t=2.288, df=10	0.045
			CNO - N vs F				t=2.495, df=10	0.032
Combined LS-VTA SDT DREADD - Timespent	4F	ANOVA	ANOVA table	SS	DF	MS	F (DFn, DFd)	P value	10
			Saline vs CNO x Novel vs Familiar	3020	1	3020	F (1, 18) = 17.85	P<.001
			Saline vs CNO	35.16	1	35.16	F (1, 18) = 0.2079	P=.654
			Novel vs Familiar	267.1	1	267.1	F (1, 18) = 1.465	P=.242
		Sidak PH	NF DREADD Saline					0.001	10
		Sidak PH	NF DREADD CNO					0.091
Combined LS-VTA SDT DREADD - Discrimination Score	4G	t-test (two-tailed)	Saline vs CNO				t, df	P value (two tailed)	10
							t=3.039, df=9	0.014
		One sample t-test					t, df	P value (two tailed)
		(two-tailed)	Saline - N vs F				t=3.112, df=9	0.012	10
			CNO - N vs F				t=1.356, df=9	0.208
Combined LS-VTA Food mCherry - Timespent	4H	ANOVA	ANOVA table	SS	DF	MS	F (DFn, DFd)	P value	10
			Saline vs CNO x Novel vs Familiar	1.264	1	1.264	F (1, 18) = 0.005640	P=.941
			Saline vs CNO	9.487	1	9.487	F (1, 18) = 0.04235	P=.839
			Novel vs Familiar	5120	1	5120	F (1, 18) = 31.15	P<.001
		Sidak PH	NF mCherry Saline					0.002	10
		Sidak PH	NF mCherry CNO					0.001
		t-test (two-tailed)	Saline vs CNO				t, df	P value (two tailed)	10
							t=0.01852, df=9	0.9856
Combined LS-VTA Food mCherry - Discrimination Score	4I	One sample t-test					t, df	P value (two tailed)	10
		(two-tailed)	Saline - N vs F				t=3.504, df=9	0.007
			CNO - N vs F				t=2.205, df=9	0.055
Combined LS-VTA Food DREADD - Timespent	4J	ANOVA	ANOVA table	SS	DF	MS	F (DFn, DFd)	P value	9
			Saline vs CNO x Novel vs Familiar	736.7	1	736.7	F (1, 16) = 3.586	P=.076
			Saline vs CNO	12.1	1	12.1	F (1, 16) = 0.05888	P=.811
			Novel vs Familiar	438.5	1	438.5	F (1, 16) = 0.9695	P=.339
		Sidak PH	NF DREADD Saline					0.07	9
		Sidak PH	NF DREADD CNO					0.81
Combined LS-VTA Food DREADD - Discrimination Score	4K	t-test (two-tailed)	Saline vs CNO				t, df	P value (two tailed)	9
							t=1.328, df=8	0.2209
		One sample t-test					t, df	P value (two tailed)
		(two-tailed)	Saline - N vs F				t=2.136, df=8	0.065	9
			CNO - N vs F				t=0.1776, df=8	0.863
Combined LS-VTA Open Field mCherry - Timespent -Center	4L	Paired t-test (two-tailed)	Saline vs CNO				t, df	P value (two tailed)	8
							t=1.348, df=7	0.2196
Combined LS-VTA Open Field mCherry - Velocity	4M	Paired t-test (two-tailed)	Saline vs CNO				t, df	P value (two tailed)	8
							t=2.105, df=7	0.0733
Combined LS-VTA Open Field DREADDs - Timespent -Center	4N	Paired t-test (two-tailed)	Saline vs CNO				t, df	P value (two tailed)	7
							t=1.375, df=6	0.2182
Combined LS-VTA Open Field DREADD - Velocity	4O	Paired t-test (two-tailed)	Saline vs CNO				t, df	P value (two tailed)	7
							t=0.3769, df=6	0.7193
