# Supplementary material for: A ventral hippocampal-lateral septum pathway regulates social novelty preference
Source: eLife. 2025 Jun 4;13:RP97259. doi: 10.7554/eLife.97259 (PMC12136592; doi:10.7554/eLife.97259)
Supplement: Figure 5—source data 1. [file elife-97259-fig5-data1.xlsx]

## Sheet: Sheet1
Animal ID	Total LS cells	Caudal cells	Rostral cells	Ventral cells		LSc	LSr	LSv
M4	1887	426	1331	130		22.5755	70.5352	6.88924	100
M5	1055	149	811	95		14.1232	76.872	9.00474	100
M6	1719	242	1206	271		14.078	70.1571	15.765	100
	Average	272.333	1116	165.333		16.9256	72.5214	10.553
	SEM	81.3886	156.711	53.7907		2.82501	2.17803	2.67659
									One Way ANOVA	p
									Interaction	<.0001
									Posthoc tukey
									HSD[.05]=11.19; HSD[.01]=16.28
									M1 vs M2 P<.01
									M1 vs M3 nonsignificant
									M2 vs M3 P<.01
