# Supplementary material for: A ventral hippocampal-lateral septum pathway regulates social novelty preference
Source: eLife. 2025 Jun 4;13:RP97259. doi: 10.7554/eLife.97259 (PMC12136592; doi:10.7554/eLife.97259)
Supplement: Supplementary file 1. [file elife-97259-supp1.xlsx]

## Sheet: Figure 1
Name	Figure	Test						P value	N
Combined vHPC-LS SDT mCherry - Timespent	1D	ANOVA	ANOVA table	SS	DF	MS	F (DFn, DFd)	P value	19
			Saline vs CNO x Novel vs Familiar	27.83	1	27.83	F (1, 36) = 0.2246	P=.638
			Saline vs CNO	12.77	1	12.77	F (1, 36) = 0.1030	P=.750
			Novel vs Familiar	9514	1	9514	F (1, 36) = 27.86	P=6.40E-06
		Sidak PH	NF mCherry Saline					0.00011
		Sidak PH	NF mCherry CNO					1.9e-05
Combined vHPC-LS SDT mCherry - Discrimination Score	1E	One sample t-test					t, df	P value (two tailed)	19
		(two-tailed)	Saline - N vs F				t=2.865, df=18	0.0103
			CNO - N vs F				t=3.810, df=18	0.0013
Combined vHPC-LS SDT DREADD - Timespent	1F	ANOVA	ANOVA table	SS	DF	MS	F (DFn, DFd)	P value	20
			Saline vs CNO x N vs F	1245	1	1245	F (1, 38) = 13.16	P=8.4E-04
			Saline vs CNO	0.01122	1	0.01122	F (1, 38) = 0.0001186	P=.991
			N vs F	1494	1	1494	F (1, 38) = 9.987	P=.003
		Sidak PH	NF DREADD Saline					2e-05
		Sidak PH	NF DREADD CNO					0.971
Combined vHPC-LS SDT DREADD - Discrimination Score	1G	One sample t-test					t, df	P value (two tailed)	20
		(two-tailed)	Saline - N vs F				t=3.952, df=19	0.0009
			CNO - N vs F				t=0.09902, df=19	0.9222
Combined vHPC-LS Food mCherry - Timespent	1H	ANOVA	ANOVA table	SS	DF	MS	F (DFn, DFd)	P value	18
			Saline vs CNO	2.331	1	2.331	F (1, 17) = 0.5605	P=.464
			Novel vs Familiar	5318	1	5318	F (1, 17) = 12.15	P=.003
			Saline vs CNO x Novel vs Familiar	302	1	302	F (1, 17) = 1.392	P=.254
		Sidak PH	NF mCherry Saline					0.0323
		Sidak PH	NF mCherry CNO					0.0009
Combined vHPC-LS Food mCherry - Discrimination Score	1I	One sample t-test					t, df	P value (two tailed)	18
		(two-tailed)	Saline - N vs F				t=2.759, df=17	0.0134
			CNO - N vs F				t-3.001, df=17	0.008
Combined vHPC-LS Food DREADD - Timespent	1J	ANOVA	ANOVA table	SS	DF	MS	F (DFn, DFd)	P value	16
			Saline vs CNO x Novel vs Familiar	25.62	1	25.62	F (1, 30) = 0.4482	P=.508
			Saline vs CNO	4.485	1	4.485	F (1, 30) = 0.07846	P=.781
			Novel vs Familiar	2088	1	2088	F (1, 30) = 23.89	P=3.2E-05
		Sidak PH	NF DREADD Saline					0.00017
		Sidak PH	NF DREADD CNO					0.003
Combined vHPC-LS Food DREADD - Discrimination Score	1K	One sample t-test					t, df	P value (two tailed)	16
		(two-tailed)	Saline - N vs F				t=3.850, df=15	0.0016
			CNO - N vs F				t=2.224, df=15	0.0419
Combined vHPC-LS Open Field mCherry - Timespent -Center	1L	Paired t-test (two-tailed)	Saline vs CNO				t, df	P value (two tailed)	19
							t=1.030, df=18	0.3167
Combined vHPC-LS Open Field mCherry - Velocity	1M	Paired t-test (two-tailed)	Saline vs CNO				t, df	P value (two tailed)	19
							t=1.140, df=18	0.2694
Combined vHPC-LS Open Field DREADDs - Timespent -Center	1N	Paired t-test (two-tailed)	Saline vs CNO				t, df	P value (two tailed)	20
							t=1.380, df=19	0.1837
Combined vHPC-LS Open Field DREADD - Velocity	1O	Paired t-test (two-tailed)	Saline vs CNO				t, df	P value (two tailed)	20
							t=0.2719, df=19	0.7886

## Sheet: Figure 2
Name	Figure	Test						P value	N
vHPC-LS EYFP SDT Time spent	2D	ANOVA	ANOVA table	SS	DF	MS	F (DFn, DFd)	P value	20
			OFF vs ON x N vs F	75.97	2	37.98	F (2, 57) = 0.1074	P=.898
			OFF vs ON	61.83	2	30.92	F (2, 57) = 5.010	P=.010
			N vs F	7352	1	7352	F (1, 57) = 20.80	P=2.8E-05
		Multiple comparison						Adjusted P Value
		Sidak PH	OFF					0.032
		Sidak PH	N ON					0.012
		Sidak PH	F ON					0.032
vHPC-LS EYFP SDT Discrimination Score	2E	One Sample t-test (two tailed)					t, df	P value (two tailed)	20
		OFF					t=2.951, df=19	0.008
		Novel On					t=2.893, df=19	0.009
		Familiar ON					t=2.371, df=19	0.028
vHPC-LS NpHR SDT Time spent	2F	ANOVA	ANOVA table	SS	DF	MS	F (DFn, DFd)	P value	15
			On vs OFF x Novel vs Familiar	761.1	2	380.5	F (2, 56) = 3.988	P=.024
			On vs OFF	9.341	2	4.67	F (2, 56) = 0.04894	P=.952
			Novel vs Familiar	910.2	1	910.2	F (1, 28) = 8.649	P=.006
		Multiple comparison						Adjusted P Value
		Sidak PH	OFF					0.006
		Sidak PH	N ON					0.037
		Sidak PH	F ON					0.949
vHPC-LS NpHR SDT Discrimination Score	2G	One Sample t-test (two tailed)					t, df	P value (two tailed)	15
		OFF					t=3.834, df=14	0.002
		Novel On					t=1.377, df=14	0.19
		Familiar ON					t=0.3676, df=14	0.719
vHPC-LS EYFP Novel Novel Time spent	2H	ANOVA	ANOVA table	SS	DF	MS	F (DFn, DFd)	P value	20
			OFF vs ON x Novel 1vs Novel2	1147	1	1147	F (1, 38) = 8.462	P=.006
			OFF vs ON	10.67	1	10.67	F (1, 38) = 0.07874	P=.781
			Novel 1vs Novel2	71.55	1	71.55	F (1, 38) = 0.2669	P=.608
		Multiple comparison						Adjusted P Value	20
		Sidak PH	OFF					0.376
		Sidak PH	N-ON					0.075
vHPC-LS EYFP Novel Novel Discrimination Score	2I	One sample t-test					t, df	P value (two tailed)
		(two-tailed)	OFF				t=0.6321, df=19	0.535
			N-ON				t=1.592, df=19	0.128
vHPC-LS NpHR Novel Novel Time spent	2J	ANOVA	ANOVA table	SS	DF	MS	F (DFn, DFd)	P value	15
			On Vs OFF x Novel vs Novel	920.8	1	920.8	F (1, 28) = 4.622	P=.040
			On Vs OFF	20.45	1	20.45	F (1, 28) = 0.1027	P=.751
			Novel vs Novel	1219	1	1219	F (1, 28) = 9.481	P=.005
		Multiple comparison						Adjusted P Value	15
		Sidak PH	OFF					0.961
		Sidak PH	N-ON					0.001
vHPC-LS NpHR Novel Novel Discrimination score	2K	One sample t-test					t, df	P value (two tailed)	15
		(two-tailed)	OFF				t=0.2640, df=14	0.796
			N-ON				t=2.440, df=14	0.029
vHPC-LS EYFP Novel Object Time spent	2L		ANOVA table	SS	DF	MS	F (DFn, DFd)	P value	14
			ON vs OFF x Novel vs Novel	8.083	1	8.083	F (1, 26) = 0.02399	P=.878
			ON vs OFF	0.2762	1	0.2762	F (1, 26) = 0.0008197	P=.977
			Novel vs Novel	476.5	1	476.5	F (1, 26) = 1.578	P=.220
		Multiple comparison						Adjusted P Value	14
		Sidak PH	OFF					0.704
		Sidak PH	N-ON					0.556
vHPC-LS EYFP Novel Object Discrimination Score	2M	One sample t-test					t, df	P value (two tailed)	14
		(two-tailed)	OFF				t=0.3982, df=13	0.697
			ON				t=0.8284, df=13	0.422
vHPC-LS NpHR Novel Object Time spent	2N	ANOVA	ANOVA table	SS	DF	MS	F (DFn, DFd)	P value	11
			ON vs OFF x Novel	14.2	1	14.2	F (1, 20) = 0.02704	P=.871
			ON vs OFF	1.441	1	1.441	F (1, 20) = 0.002745	P=.959
			Novel	100	1	100	F (1, 20) = 0.4612	P=.505
		Multiple comparison						Adjusted P Value	11
		Sidak PH	OFF					0.853
		Sidak PH	N-ON					0.968
vHPC-LS NpHR Novel Object Discrimination Score	2O	One sample t-test					t, df	P value (two tailed)	11
		(two-tailed)	OFF				t=0.3689, df=10	0.72
			ON				t=0.1225, df=10	0.905
vHPC-LS EYFP Open Field Time spent	2P	ANOVA	ANOVA table	SS	DF	MS	F (DFn, DFd)	P value	20
			Treatment (between columns)	158.4	2	79.22	F (2, 57) = 2.470	P=.094
			Residual (within columns)	1828	57	32.07
		Multiple comparison						Adjusted P Value	20
		Sidak PH	ON vs. OFF					0.438
		Sidak PH	OFF vs. OFF					0.093
		Sidak PH	OFF vs. ON					0.797
vHPC-LS EYFP Open Field Velocity	2Q	ANOVA	ANOVA table	SS	DF	MS	F (DFn, DFd)	P value	20
			Treatment (between columns)	349.6	2	174.8	F (2, 57) = 1.383	P=.259
			Residual (within columns)	7203	57	126.4
		Multiple comparison						Adjusted P Value	20
		Sidak PH	ON vs. OFF					0.6
		Sidak PH	OFF vs. OFF					0.296
		Sidak PH	OFF vs. ON					0.947
vHPC-LS NpHR Open Field Time spent	2R	ANOVA	ANOVA table	SS	DF	MS	F (DFn, DFd)	P value	15
			Treatment (between columns)	90.1	2	45.05	F (2, 42) = 1.415	P=.254
			Residual (within columns)	1337	42	31.83
		Multiple comparison						Adjusted P Value	15
		Sidak PH	ON vs. OFF					0.66
		Sidak PH	OFF vs. OFF					0.279
		Sidak PH	OFF vs. ON					0.902
vHPC-LS NpHR Open Field Velocity	2S	ANOVA	ANOVA table	SS	DF	MS	F (DFn, DFd)	P value	15
			Treatment (between columns)	8.157	2	4.078	F (2, 42) = 0.2565	P=.775
			Residual (within columns)	667.7	42	15.9
		Multiple comparison						Adjusted P Value	15
		Sidak PH	ON vs. OFF					0.969
		Sidak PH	OFF vs. OFF					0.986
		Sidak PH	OFF vs. ON					0.859

## Sheet: Figure 3
Name	Figure	Test						P value	N
% total input	3H	ANOVA	ANOVA table	SS	DF	MS	F (DFn, DFd)	P value	3
			Treatment (between columns)	1360	3	453.4	F (3, 8) = 7.410	P=0.0107
			Residual (within columns)	489.5	8	61.19
			Total	1850	11
		Multiple comparison						Adjusted P Value
Wholebrain		Dunnett's multiple comparisons test	HPF vs. Isocortex					0.1579
			HPF vs. HY					0.0206
			HPF vs. TH					0.0056
% total input	3I	ANOVA	ANOVA table	SS	DF	MS	F (DFn, DFd)	P value	3
			Treatment (between columns)	602.1	4	150.5	F (4, 10) = 6.074	P=0.0096
			Residual (within columns)	247.8	10	24.78
			Total	850	14
		Multiple comparison						Adjusted P Value
HPF Comparisons		Dunnett's multiple comparisons test	Dunnett's multiple comparisons test
			CA1 vs. CA3					0.8938
			CA1 vs. DG					0.0411
			CA1 vs. SUBd					0.0511
			CA1 vs. SUBv					0.0995
			CA3 vs. DG					0.0134
			CA3 vs. SUBd					0.0166
			CA3 vs. SUBv					0.0325
dCA1 vs vCA1	3J	Paired t test							3
								P value
			P value summary	*				0.0496
			Significantly different (P < 0.05)?	Yes
			One- or two-tailed P value?	Two-tailed
			t, df	t=4.320, df=2
			Number of pairs	3
dCA3 vs vCA3	3K	Paired t test							3
								P value
			P value summary	ns				0.7736
			Significantly different (P < 0.05)?	No
			One- or two-tailed P value?	Two-tailed
			t, df	t=0.3287, df=2
			Number of pairs	3

## Sheet: Figure 4
Name	Figure	Test						P value	N
Combined LS-VTA SDT mCherry - Timespent	4D	ANOVA	ANOVA table	SS	DF	MS	F (DFn, DFd)	P value	11
			Saline vs CNO x Novel vs Familiar	65.37	1	65.37	F (1, 20) = 1.098	P=.307
			Saline vs CNO	0.02268	1	0.02268	F (1, 20) = 0.0003810	P=.985
			Novel vs Familiar	4056	1	4056	F (1, 20) = 16.10	P=6.8E-04
		Sidak PH	NF mCherry Saline					0.00022
		Sidak PH	NF mCherry CNO					0.0031
Combined LS-VTA SDT mCherry - Discrimination Score	4E	One sample t-test					t, df	P value (two tailed)	11
		(two-tailed)	Saline - N vs F				t=2.288, df=10	0.045
			CNO - N vs F				t=2.495, df=10	0.032
Combined LS-VTA SDT DREADD - Timespent	4F	ANOVA	ANOVA table	SS	DF	MS	F (DFn, DFd)	P value	10
			Saline vs CNO x Novel vs Familiar	3020	1	3020	F (1, 18) = 17.85	P=5.1E-04
			Saline vs CNO	35.16	1	35.16	F (1, 18) = 0.2079	P=.654
			Novel vs Familiar	267.1	1	267.1	F (1, 18) = 1.465	P=.242
		Sidak PH	NF DREADD Saline					0.001
		Sidak PH	NF DREADD CNO					0.091
Combined LS-VTA SDT DREADD - Discrimination Score	4G	One sample t-test					t, df	P value (two tailed)
		(two-tailed)	Saline - N vs F				t=3.112, df=9	0.012	10
			CNO - N vs F				t=1.356, df=9	0.208
Combined LS-VTA Food mCherry - Timespent	4H	ANOVA	ANOVA table	SS	DF	MS	F (DFn, DFd)	P value	10
			Saline vs CNO x Novel vs Familiar	1.264	1	1.264	F (1, 18) = 0.005640	P=.941
			Saline vs CNO	9.487	1	9.487	F (1, 18) = 0.04235	P=.839
			Novel vs Familiar	5120	1	5120	F (1, 18) = 31.15	P=2.7E-05
		Sidak PH	NF mCherry Saline					0.002
		Sidak PH	NF mCherry CNO					0.001
Combined LS-VTA Food mCherry - Discrimination Score	4I	One sample t-test					t, df	P value (two tailed)	10
		(two-tailed)	Saline - N vs F				t=3.504, df=9	0.007
			CNO - N vs F				t=2.205, df=9	0.055
Combined LS-VTA Food DREADD - Timespent	4J	ANOVA	ANOVA table	SS	DF	MS	F (DFn, DFd)	P value	9
			Saline vs CNO x Novel vs Familiar	736.7	1	736.7	F (1, 16) = 3.586	P=.076
			Saline vs CNO	12.1	1	12.1	F (1, 16) = 0.05888	P=.811
			Novel vs Familiar	438.5	1	438.5	F (1, 16) = 0.9695	P=.339
		Sidak PH	NF DREADD Saline					0.07
		Sidak PH	NF DREADD CNO					0.81
Combined LS-VTA Food DREADD - Discrimination Score	4K	One sample t-test					t, df	P value (two tailed)
		(two-tailed)	Saline - N vs F				t=2.136, df=8	0.065	9
			CNO - N vs F				t=0.1776, df=8	0.863
Combined LS-VTA Open Field mCherry - Timespent -Center	4L	Paired t-test (two-tailed)	Saline vs CNO				t, df	P value (two tailed)	8
							t=1.348, df=7	0.2196
Combined LS-VTA Open Field mCherry - Velocity	4M	Paired t-test (two-tailed)	Saline vs CNO				t, df	P value (two tailed)	8
							t=2.105, df=7	0.0733
Combined LS-VTA Open Field DREADDs - Timespent -Center	4N	Paired t-test (two-tailed)	Saline vs CNO				t, df	P value (two tailed)	7
							t=1.375, df=6	0.2182
Combined LS-VTA Open Field DREADD - Velocity	4O	Paired t-test (two-tailed)	Saline vs CNO				t, df	P value (two tailed)	7
							t=0.3769, df=6	0.7193

## Sheet: Figure 5
Name	Figure	Test						P value	N
% total input	5H	ANOVA	ANOVA table	SS	DF	MS	F (DFn, DFd)	P value	3
			Treatment (between columns)	6972	2	3486	F (2, 6) = 175.3	P=5.0E-06
		Tukey's multiple comparisons test						Adjusted P Value
LS Comparisons			LSc vs. LSr					1.2e-05
			LSc vs. LSv					0.26
			LSr vs. LSv					6e-06

## Sheet: Supplementary Figure 1
Name	Figure	Test						P value	N
Males vHPC-LS SDT mCherry - Timespent	Supp Fig 1A	ANOVA	ANOVA table	SS	DF	MS	F (DFn, DFd)	P value	12
			Saline vs CNO x N vs F	40.94	1	40.94	F (1, 22) = 0.5162	P=.480
			Saline vs CNO	5.966	1	5.966	F (1, 22) = 0.07522	P=.786
			N vs F	3066	1	3066	F (1, 22) = 15.15	P=7.84E-04
		Sidak PH	NF mCherry Saline					0.011
		Sidak PH	NF mCherry CNO					0.001
Males vHPC-LS SDT mCherry - Discrimination Score	Supp Fig 1B	One sample t-test					t, df	P value (two tailed)	12
		(two-tailed)	Saline - N vs F				t=1.912, df=11	0.082
			CNO - N vs F				t=3.266, df=11	0.008
Males vHPC-LS SDT DREADD - Timespent	Supp Fig 1C	ANOVA	ANOVA table	SS	DF	MS	F (DFn, DFd)	P value	9
			Saline vs CNO x N vs F	1284	1	1284	F (1, 16) = 17.95	P=6.28E-04
			Saline vs CNO	1.545	1	1.545	F (1, 16) = 0.02160	P=.885
			N vs F	82.32	1	82.32	F (1, 16) = 1.236	P=.283
		Sidak PH	NF mCherry Saline					0.001
		Sidak PH	NF mCherry CNO					0.058
Males vHPC-LS SDT DREADD - Discrimination Score	Supp Fig 1D	One sample t-test					t, df	P value (two tailed)	9
		(two-tailed)	Saline - N vs F				t=2.630, df=8	0.03
			CNO - N vs F				t=2.205, df=8	0.059
Females vHPC-LS SDT mCherry - Timespent	Supp Fig 1E	ANOVA	ANOVA table	SS	DF	MS	F (DFn, DFd)	P value	7
			Saline vs CNO x N vs F	0.09855	1	0.09855	F (1, 12) = 0.0004377	P=.984
			Saline vs CNO	7.227	1	7.227	F (1, 12) = 0.03210	P=.861
			N vs F	7779	1	7779	F (1, 12) = 14.39	P=.003
		Sidak PH	NF mCherry Saline					0.008
		Sidak PH	NF mCherry CNO					0.008
Females vHPC-LS SDT mCherry - Discrimination Score	Supp Fig 1F	One sample t-test					t, df	P value (two tailed)	7
		(two-tailed)	Saline - N vs F				t=2.144, df=6	0.076
			CNO - N vs F				t=2.404, df=6	0.053
Females vHPC-LS SDT DREADD - Timespent	Supp Fig 1G	ANOVA	ANOVA table	SS	DF	MS	F (DFn, DFd)	P value	11
			Saline vs CNO x Novel vs Familiar	229.9	1	229.9	F (1, 20) = 2.110	P=.162
			Saline vs CNO	0.9635	1	0.9635	F (1, 20) = 0.008842	P=.926
			Novel vs Familiar	1928	1	1928	F (1, 20) = 9.417	P=.006
		Sidak PH	NF mCherry Saline					0.004
		Sidak PH	NF mCherry CNO					0.212
Females vHPC-LS SDT DREADD - Discrimination Score	Supp Fig 1H	One sample t-test					t, df	P value (two tailed)	11
		(two-tailed)	Saline - N vs F				t=2.840, df=10	0.018
			CNO - N vs F				t=1.090, df=10	0.301
